# Supplementary material for: Amino Acid Deletions in p6Gag Domain of HIV-1 CRF07_BC Ameliorate Galectin-3 Mediated Enhancement in Viral Budding
Source: MDPI journal article supplement (doi:10.3390/ijms21082910), 2020-04-21
Supplement: s1 [file s1]

## Supplementary Materials

### Materials and methods:

#### Construction of a full-length CRF07\_BC molecular clone

A full-length CRF07\_BC molecular clone was constructed with the strategy published elsewhere. Briefly, a full-length CRF07\_BC-p6Gag-wt HIV-1 genome was constructed by ligation of wildtype HIV CRF07\_BC PCR product into pUC57 plasmid with *EcoRV* and *SphI* restriction enzyme. The pCRF07\_BC-p6Gag-7d and the pCRF07\_BC-p6Gag-11d plasmid was derived from pCRF07\_BC with a deletion of 7 amino acids in p6 (30PIDKELY36) and 11 amino acids in p6 (26QKQEPIDKELY36) by site-directed mutagenesis respectively.

### Results:

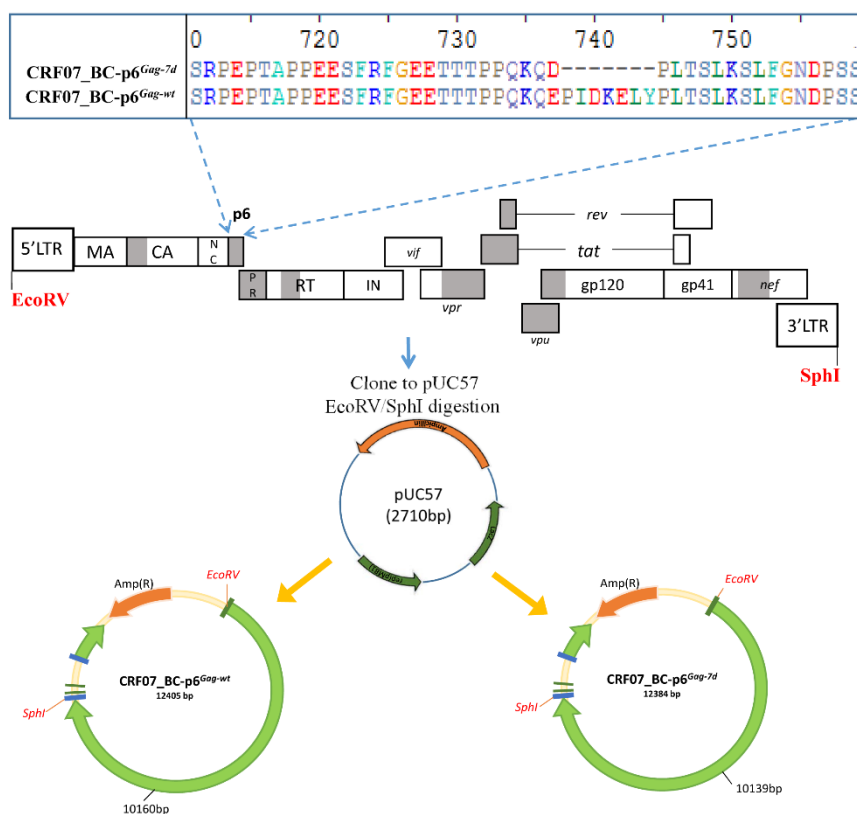

**Figure S1.** Construction of CRF07\_BC infectious clones. The full-length of CRF07\_BC with non-deletion wild-type was cloned to pUC57. Further, the 7-11 amino acid deletions were generated via site-directed mutagenesis.
